# Supplementary material for: The development of novel AIE-active staurosporine-based fluorescent probes with theranostic potential
Source: Royal Society of Chemistry journal article supplement (doi:10.1039/d5nj03817k), 2026-01-01
Supplement: d5nj03817k1.pdf [file d5nj03817k1.pdf]

## *Supporting Information*

### **Development of Novel AIE-Active Staurosporine-Based Fluorescent Probes with Theranostic Potential**

Nannan Chen <sup>a, †</sup>, Yuqiu Ye <sup>a, †</sup>, Longfeng Zhang <sup>b, †</sup>, Xia Wang <sup>a</sup>, Shijie Liu <sup>a</sup>, Xiaoming

Chen <sup>a</sup>, Tong Wu <sup>a</sup>, Jingming Zhou <sup>a</sup>, Haipeng Xu <sup>\*, b</sup> and Lijun Xie <sup>\*, a</sup>

<sup>a</sup> Fujian Provincial Key Laboratory of Screening for Novel Microbial Products, Fujian Institute of Microbiology, Fuzhou, Fujian 350007, P.R. China.

<sup>b</sup> Clinical Oncology School of Fujian Medical University, Fujian Cancer Hospital, Fuzhou, Fujian 350014, P.R. China.

\* Correspondence:

Haipeng Xu Email: penghaixu@163.com

Lijun Xie Email: lijunxie8224@outlook.com

† These authors contributed equally to this work.

## Table of Contents

| Section                                                                                                      | Note                                                                               | Page   |
|--------------------------------------------------------------------------------------------------------------|------------------------------------------------------------------------------------|--------|
| General experimental information                                                                             |  | S3-S4  |
| Characterization of Compounds                                                                                | Fig. S1-S12                                                                        | S4-S11 |
| The absorption of compounds in DMSO/H <sub>2</sub> O mixture                                                 | Fig. S13                                                                           | S12    |
| Fluorescence emission spectra of compounds in<br>DMSO/glycerol mixture                                       | Fig. S14                                                                           | S12    |
| The absorption spectral and emission spectral of <b>STQ</b> in<br>DMSO/H <sub>2</sub> O mixture              | Fig. S15                                                                           | S13    |
| Absorption spectral of <b>Y1</b> , <b>Y2</b> and <b>Y3</b> in various solvents                               | Table S16                                                                          | S13    |
| Lippert–Mataga plot for <b>Y1</b> , <b>Y2</b> and <b>Y3</b> in various solvents                              | Fig. S17                                                                           | S14    |
| Photophysical Properties of Compounds in different solvents<br>(50 μM).                                      | Table S1                                                                           | S14    |
| TD-DFT calculations using the SMD model to evaluate<br>emission transitions of <b>Y1</b> in toluene and DMSO | Table S2                                                                           | S15    |

## **General experimental information**

**CCK-8 Assay:** First, culture the cells under appropriate conditions (37°C, 5% CO<sub>2</sub>, humidity-saturated environment). Once the cells reach the logarithmic growth phase, they are separated and processed. The MCF-7 and NCI-N87 cells are then seeded into flat-bottomed 96-well plates at a density of 7500 cells per well, with 100  $\mu$  L of complete culture medium, and incubated for 24 hours to allow for adherence and adaptation to the environment. For dark cytotoxicity assessment, after washing the cells three times with PBS, MCF-7 and NCI-N87 cells are incubated with different concentrations (0.1 nM, 1 nM, 10 nM, 100 nM, 1  $\mu$  M, 10  $\mu$  M ) of Y1, Y2, and Y3. All stock solutions are prepared in DMSO (2 mM) and subsequently diluted with complete medium. After a 24-hour incubation, the cells are washed again with PBS three times. Then, 10  $\mu$  L of Cell Counting Kit-8 (CCK-8) solution and 90  $\mu$  L of PBS are added to each well simultaneously. After an additional 1-hour incubation, the absorbance at 450 nm is measured using a 96-well plate reader. Cell viability is calculated based on the absorbance values at different concentrations, with the control group set at 100%. A curve of cell viability versus drug concentration is plotted, and the IC<sub>50</sub> value is determined using nonlinear regression analysis.

**Fluorescence imaging:** First, 100  $\mu$  L MCF-7 cell suspension was added to 1 mL medium and incubated overnight in a cell incubator. Then the cells were washed with PBS 1-2 times, the drug was mixed into a concentration of 10  $\mu$  M, and the mixture was mixed according to the ratio of 1 mL: 1  $\mu$  L (medium solution: drug). After

incubation in the incubator for 30 min, the medium was washed once with PBS, and finally 1ml fresh medium was used to replace the medium.

### Characterization of STQ

**Synthesis of STQ.** *Staurosporine* (4.00 g, 8.56 mmol) was dissolved in dichloromethane (240.0 mL) under nitrogen atmosphere and then the solution was transferred to salt ice bath at -15°C. Next, titanium tetrachloride (3.94 g, 34.24 mmol) was added dropwise. Then, dichloromethyl methyl ether (6.50 g, 34.24 mmol) was added dropwise. The reaction was stirred for 0.5 h. After that, the reaction was stirred for another 12 h at room temperature until the reaction was completed. Subsequently, the resulting mixture was poured into ice water, forming a yellow solid that was subsequently filtered to get the crude product. The resultant crude product underwent purification through column chromatography employing dichloromethane and methanol in a 50:1 vol ratio as the eluent. The final product STQ (2.20 g) was obtained as a yellow solid, with a yield of 52.9%. <sup>1</sup>H NMR (600 MHz, DMSO-*d*<sub>6</sub>) δ 10.10 (s, 1H), 9.82 (d, *J* = 1.6 Hz, 1H), 8.66 (s, 1H), 8.04 – 7.95 (m, 3H), 7.79 (d, *J* = 8.5 Hz, 1H), 7.44 (ddd, *J* = 8.6, 7.1, 1.3 Hz, 1H), 7.30 (t, *J* = 7.4 Hz, 1H), 6.80 (dd, *J* = 5.4, 1.9 Hz, 1H), 4.99 (s, 2H), 4.09 (d, *J* = 3.6 Hz, 1H), 3.37 (s, 3H), 3.27 (q, *J* = 3.8 Hz, 1H), 2.56 (ddt, *J* = 17.8, 9.4, 4.4 Hz, 2H), 2.31 (s, 3H), 1.42 – 1.35 (m, 3H), 0.77 (s, 1H).; <sup>13</sup>C NMR (151 MHz, DMSO-*d*<sub>6</sub>) δ 192.1, 171.9, 139.6, 139.4, 133.2, 130.0, 129.6, 128.6, 127.8, 125.5, 124.7, 123.6, 122.5, 121.0, 119.9, 118.9, 115.4, 114.3, 114.3, 109.2, 91.0, 82.7, 80.1, 57.1, 54.9, 49.7, 45.5, 33.2, 29.8, 29.3. HRMS (ESI): calcd for C<sub>29</sub>H<sub>26</sub>N<sub>4</sub>O<sub>4</sub>, 495.2027 [M+H]<sup>+</sup>, found, 495.2039 [M+H]<sup>+</sup>.

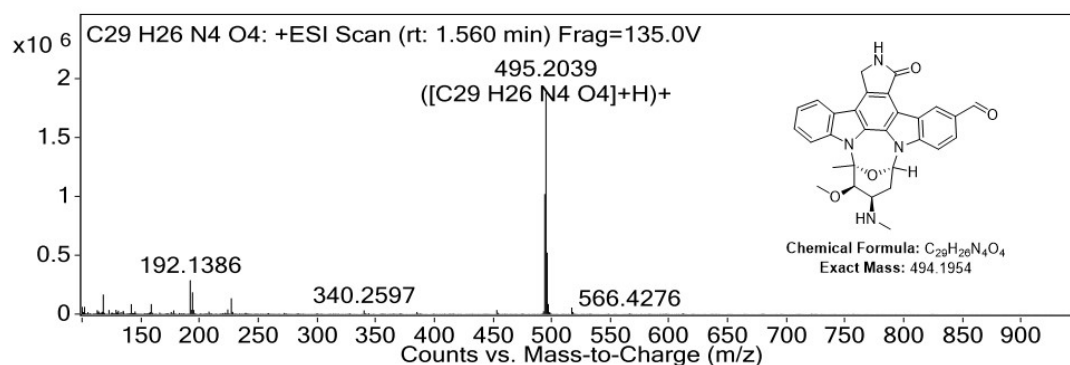

**Fig. S1** HRMS spectrum of **STQ**.

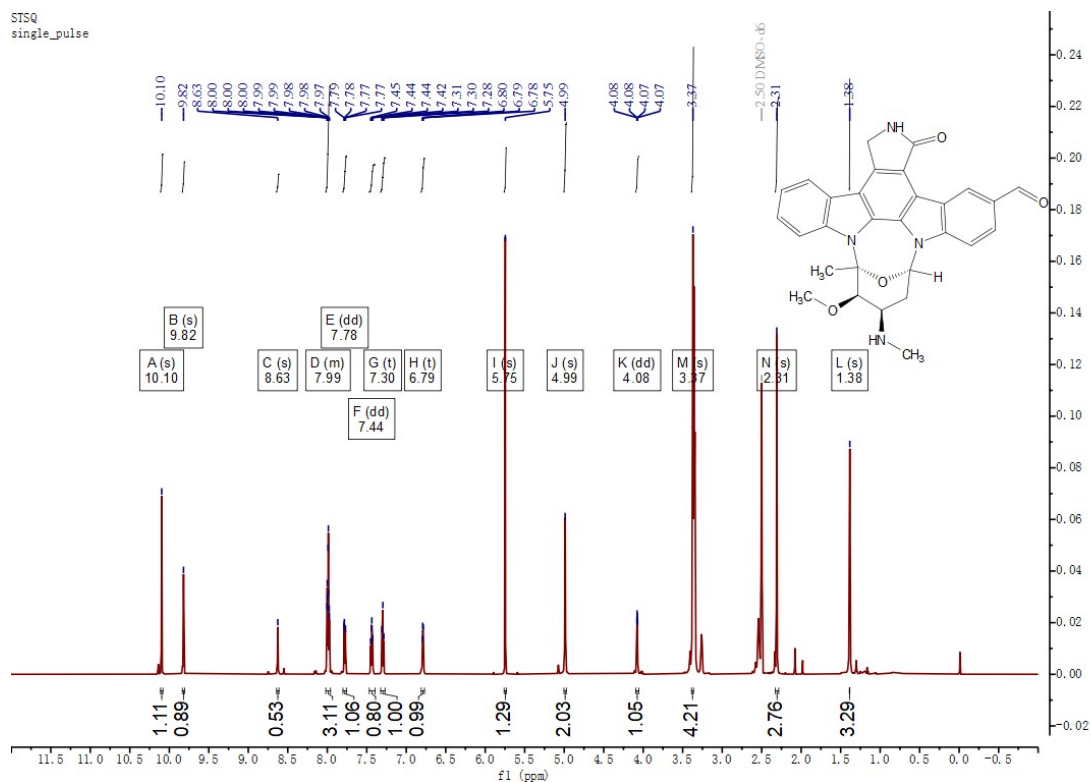

**Fig. S2**  $^1\text{H}$ -NMR spectrum of **STQ** in  $\text{DMSO-}d_6$ .

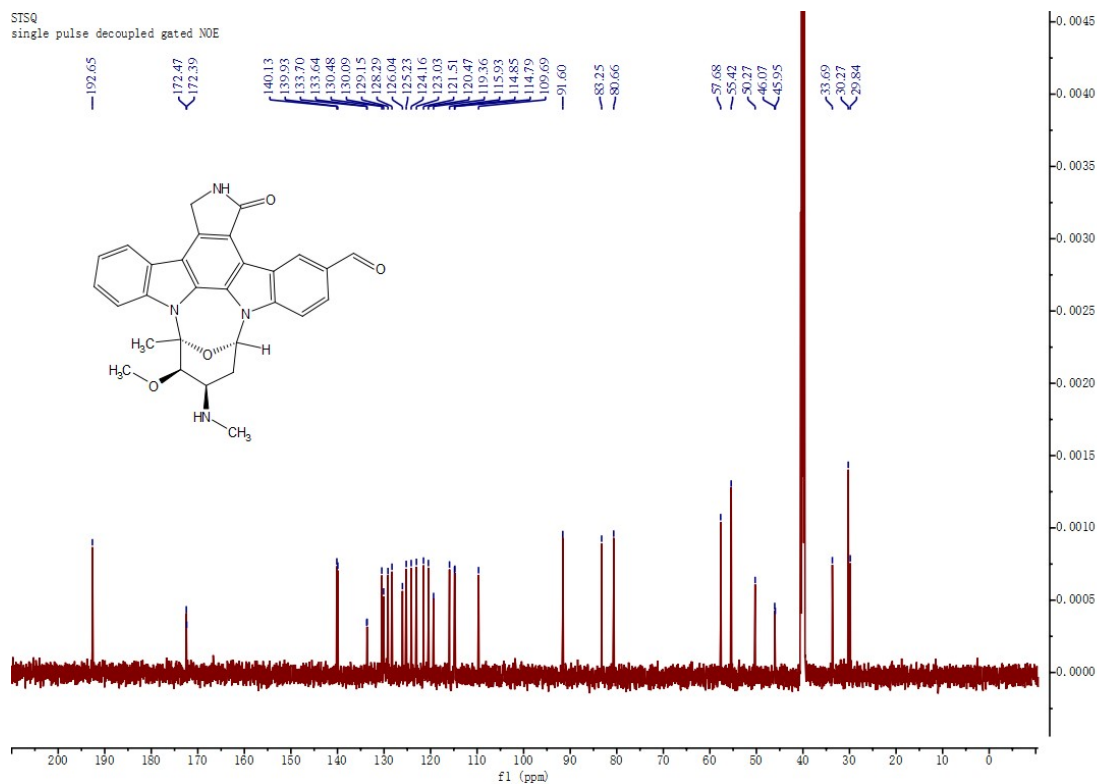

**Fig. S3**  $^{13}\text{C}$ -NMR spectrum of **STQ** in  $\text{DMSO-}d_6$ .

## Characterization of Y1

**Synthesis of Y1.** The key intermediate **STQ** (100 mg, 0.20 mmol) was reacted with 4-(trifluoromethyl)phenylacetonitrile (2.0 mmol) in ethanol (5 mL) using sodium hydroxide (8 mg, 0.2 mmol) as a base. The reaction mixture was stirred at room temperature for 12 hours in the absence of light. After completion of the reaction, confirmed by TLC analysis, the resulting precipitate was collected via filtration. The solid was subsequently washed with water and ethanol to yield the pure product, which was then dried under reduced pressure to give the orange- yellow powder **Y1** (113.6 mg) with the yield 85.1%.  $^1\text{H}$  NMR (600 MHz,  $\text{DMSO-}d_6$ )  $\delta$  9.75 (d,  $J = 1.9$  Hz, 1H), 8.61 (s, 1H), 8.32 (s, 1H), 8.27 (dd,  $J = 8.8, 1.9$  Hz, 1H), 8.04 (d,  $J = 8.1$  Hz, 2H), 8.01 - 7.97 (m, 2H), 7.87 (d,  $J = 8.1$  Hz, 2H), 7.81 (t,  $J = 8.3$  Hz, 2H), 7.46 - 7.39 (m, 1H), 7.32 - 7.26 (m, 1H), 6.81 - 6.77 (m, 1H), 4.98 (s, 2H), 4.09 (d,  $J = 3.5$  Hz, 1H), 3.37 (s, 4H), 3.27 (q,  $J = 3.8$  Hz, 1H), 2.62 - 2.52 (m, 2H), 2.31 (s, 3H), 1.41 (s, 4H), 0.81 (s, 1H).  $^{13}\text{C}$  NMR (151 MHz,  $\text{DMSO-}d_6$ )  $\delta$  171.9, 147.0, 139.6, 138.7, 137.5, 132.9, 130.0, 129.7, 129.6, 127.6, 126.3, 126.1, 126.1, 124.9, 124.7, 124.6, 123.7, 122.8, 121.0, 119.9, 119.0, 118.3, 115.4, 114.2, 114.1, 109.2, 105.2, 91.1, 91.1, 82.8, 80.1, 57.2, 49.8, 45.5, 33.3, 33.3, 29.8, 29.4. HRMS (ESI): calcd for  $\text{C}_{38}\text{H}_{31}\text{F}_3\text{N}_5\text{O}_3$ , 662.2374  $[\text{M}+\text{H}]^+$ , found: 662.2383  $[\text{M}+\text{H}]^+$ .

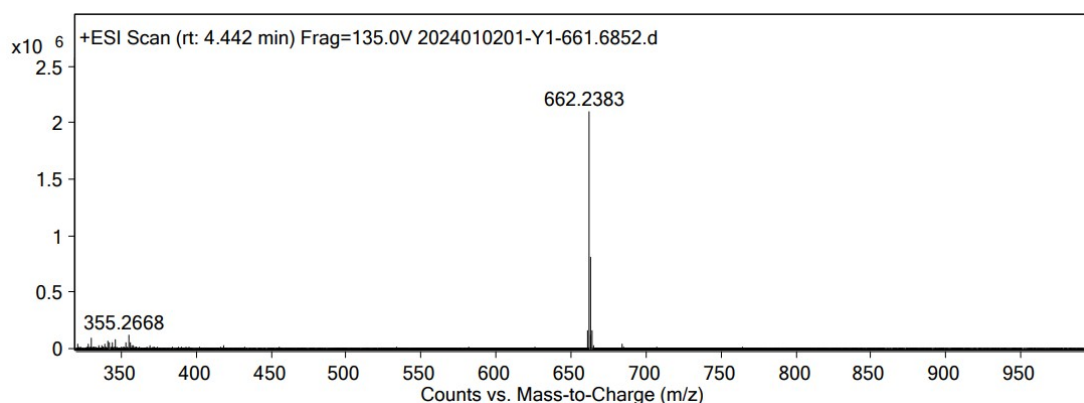

**Fig. S4** HRMS spectrum of **Y1**

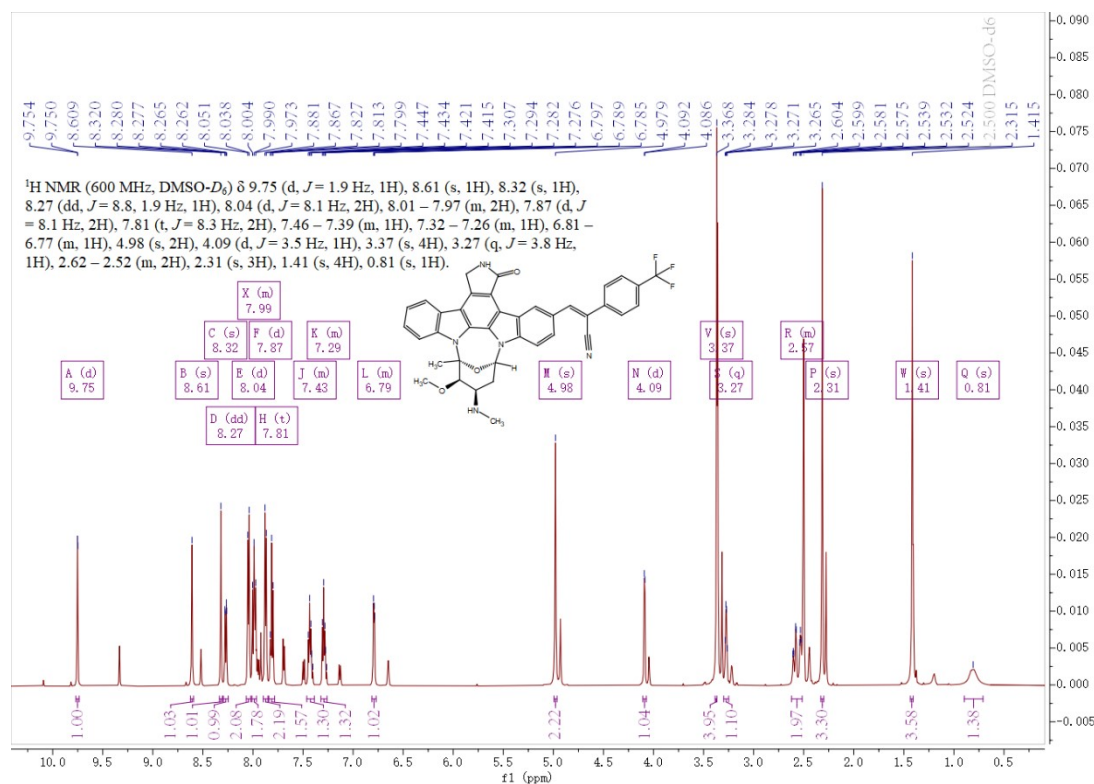

**Fig. S5** <sup>1</sup>H-NMR spectrum of Y1 in DMSO-*d*<sub>6</sub>.

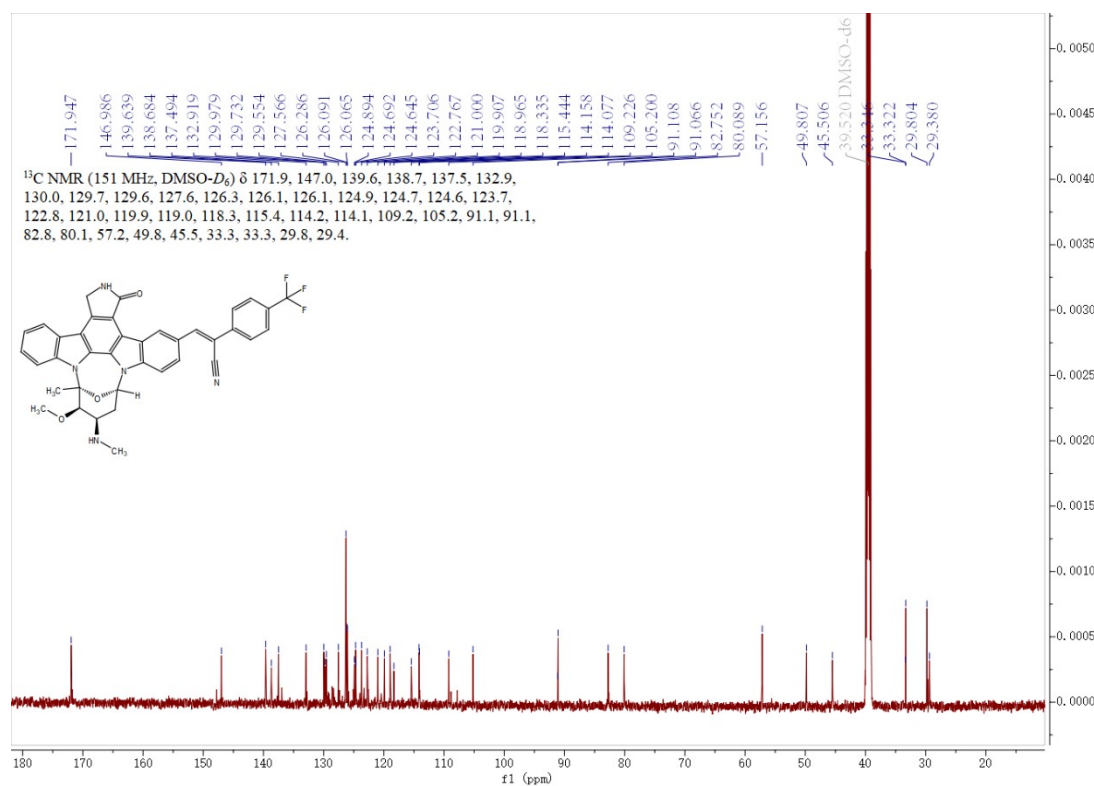

**Fig. S6** <sup>13</sup>C-NMR spectrum of Y1 in DMSO-*d*<sub>6</sub>.

## Characterization of Y2

Synthesis of **Y2**. The synthetic procedure is the same as that of **Y1**, except using 4-chlorophenylacetonitrile instead of 4-(trifluoromethyl)phenylacetonitrile. Orange-yellow powder **Y2** (111.3 mg) with the yield 87.6%.  $^1\text{H}$  NMR (600 MHz,  $\text{DMSO-}d_6$ )  $\delta$  9.71 (s, 1H), 8.60 (s, 1H), 8.22 (d,  $J = 8.7$  Hz, 1H), 8.19 (s, 1H), 7.99 (t,  $J = 9.3$  Hz, 2H), 7.84 (d,  $J = 8.2$  Hz, 2H), 7.79 (d,  $J = 8.7$  Hz, 1H), 7.58 (d,  $J = 8.2$  Hz, 2H), 7.43 (t,  $J = 7.8$  Hz, 1H), 7.29 (t,  $J = 7.3$  Hz, 1H), 6.78 (d,  $J = 5.4$  Hz, 1H), 4.98 (s, 2H), 4.08 (d,  $J = 3.5$  Hz, 1H), 3.36 (s, 3H), 3.27 (s, 1H), 2.61 - 2.52 (m, 2H), 2.31 (s, 3H), 1.41 (d,  $J = 5.9$  Hz, 3H), 0.78 (q,  $J = 6.7$  Hz, 1H).  $^{13}\text{C}$  NMR (151 MHz,  $\text{DMSO-}d_6$ )  $\delta$  172.0, 145.3, 139.6, 137.3, 133.5, 133.1, 132.8, 130.0, 129.2, 129.1, 127.5, 127.3, 124.9, 124.7, 124.6, 123.7, 122.7, 121.0, 119.9, 119.0, 118.4, 115.4, 114.1, 114.1, 109.1, 105.6, 91.1, 82.8, 80.1, 57.2, 49.8, 45.5, 33.3, 29.8, 29.4, 0.1. HRMS (ESI): calcd for  $\text{C}_{37}\text{H}_{31}\text{ClN}_5\text{O}_3$ , 628.2110  $[\text{M}+\text{H}]^+$ , found: 628.2114  $[\text{M}+\text{H}]^+$ .

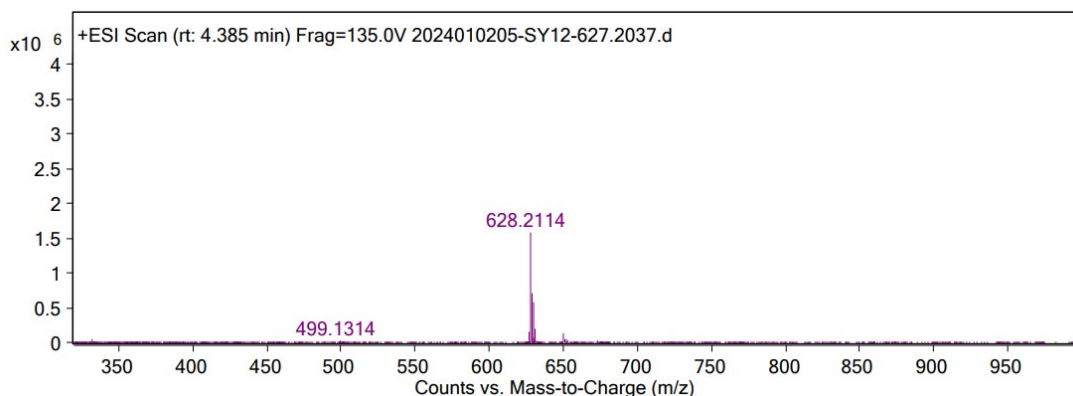

**Fig. S7** HRMS spectrum of **Y2**.



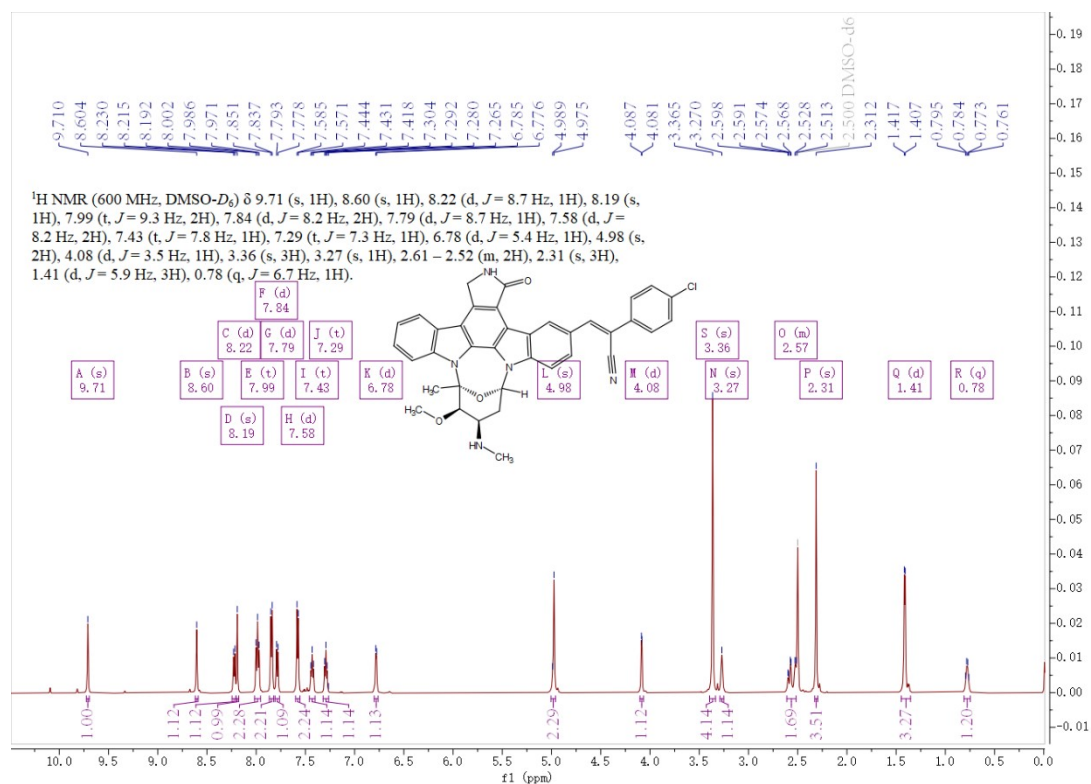

**Fig. S8** <sup>1</sup>H-NMR spectrum of **Y2** in DMSO-*d*<sub>6</sub>.

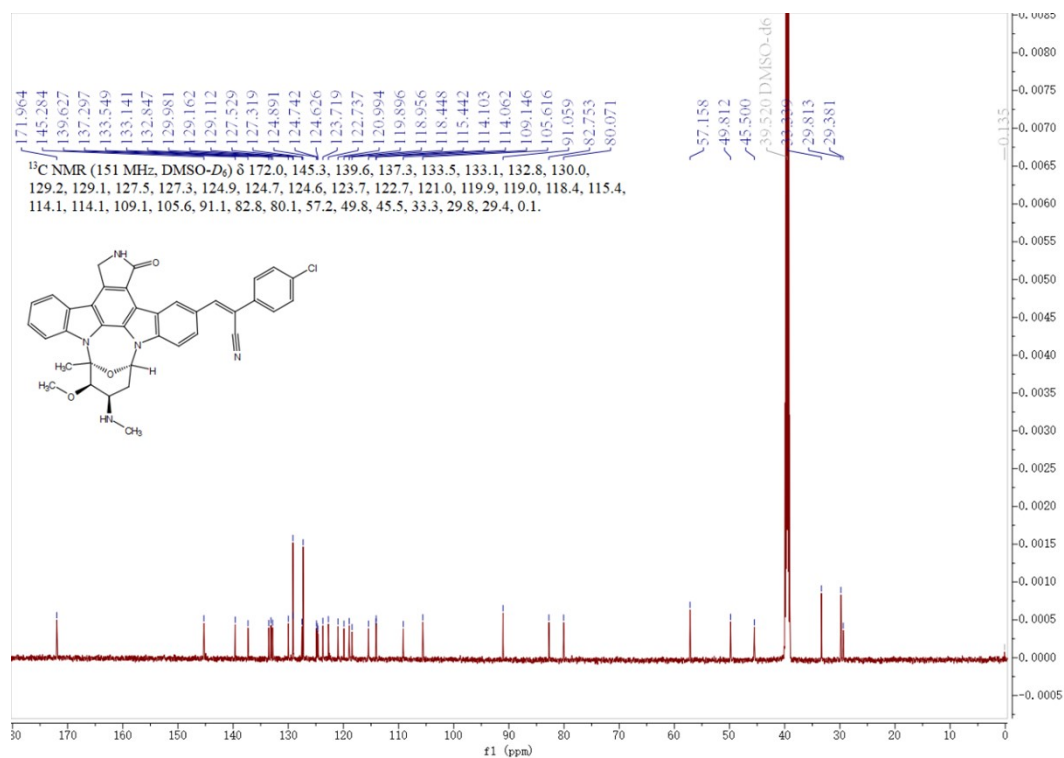

**Fig. S9** <sup>13</sup>C-NMR spectrum of **Y2** in DMSO-*d*<sub>6</sub>.

## Characterization of Y3

Synthesis of **Y3**. The synthetic procedure is the same as that of **Y1**, except using 4-biphenylacetonitrile instead of 4-(trifluoromethyl)phenylacetonitrile. Orange- yellow powder **Y3** (100.2 mg) with the yield 74.2%.  $^1\text{H}$  NMR (600 MHz,  $\text{DMSO-}d_6$ )  $\delta$  9.75 (s, 1H), 8.62 (s, 1H), 8.26 (d,  $J = 8.6$  Hz, 1H), 8.22 (s, 1H), 7.99 (dd,  $J = 11.8, 8.1$  Hz, 2H), 7.89 (d,  $J = 7.9$  Hz, 2H), 7.80 (d,  $J = 8.3$  Hz, 3H), 7.72 (d,  $J = 7.5$  Hz, 2H), 7.48 (t,  $J = 7.7$  Hz, 2H), 7.44 (t,  $J = 7.7$  Hz, 1H), 7.39 (t,  $J = 7.4$  Hz, 1H), 7.30 (t,  $J = 7.3$  Hz, 1H), 6.79 (d,  $J = 5.4$  Hz, 1H), 4.98 (s, 2H), 4.08 (d,  $J = 3.4$  Hz, 1H), 3.37 (s, 4H), 3.27 (d,  $J = 4.5$  Hz, 1H), 2.62 – 2.51 (m, 2H), 2.31 (s, 3H), 1.41 (d,  $J = 5.7$  Hz, 3H), 0.76 (d,  $J = 6.9$  Hz, 1H).  $^{13}\text{C}$  NMR (151 MHz,  $\text{DMSO-}d_6$ )  $\delta$  172.0, 144.4, 140.1, 139.6, 139.1, 137.2, 133.6, 132.8, 130.0, 129.1, 129.0, 127.9, 127.5, 127.3, 126.6, 126.1, 125.1, 124.8, 124.6, 123.7, 122.8, 121.0, 119.9, 119.0, 118.7, 115.5, 114.1, 109.1, 106.4, 91.1, 82.8, 80.1, 57.1, 49.8, 45.5, 33.3, 29.8, 29.4. HRMS (ESI): calcd for  $\text{C}_{43}\text{H}_{36}\text{N}_5\text{O}_3$ , 670.2813  $[\text{M}+\text{H}]^+$ , found: 670.2820  $[\text{M}+\text{H}]^+$ .

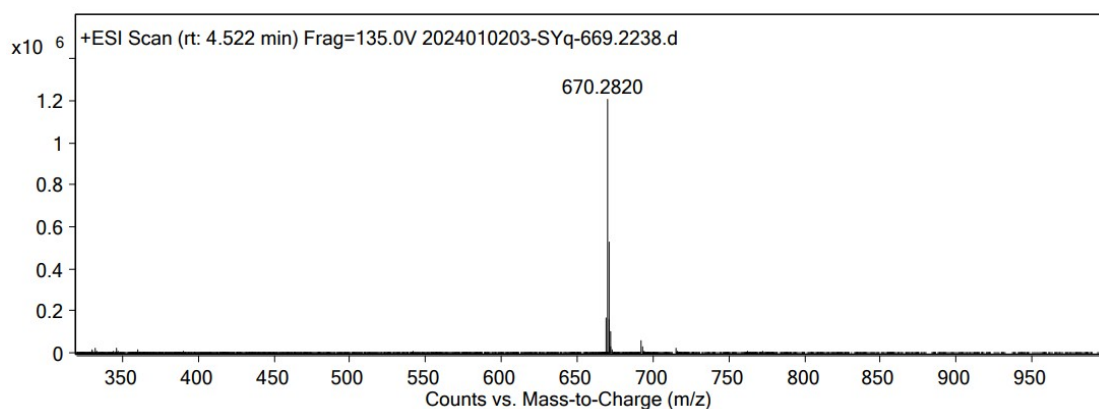

**Fig. 10** HRMS spectrum of **Y3**

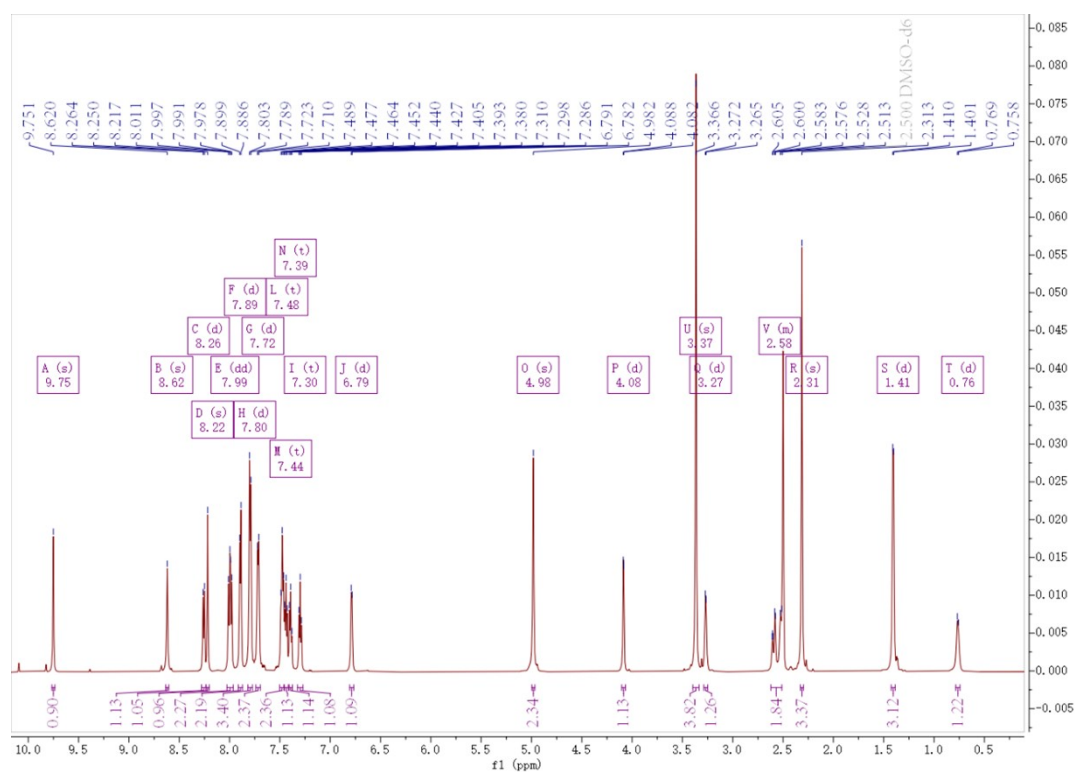

**Fig. 11** <sup>1</sup>H-NMR spectrum of **Y3** in DMSO-*d*<sub>6</sub>.

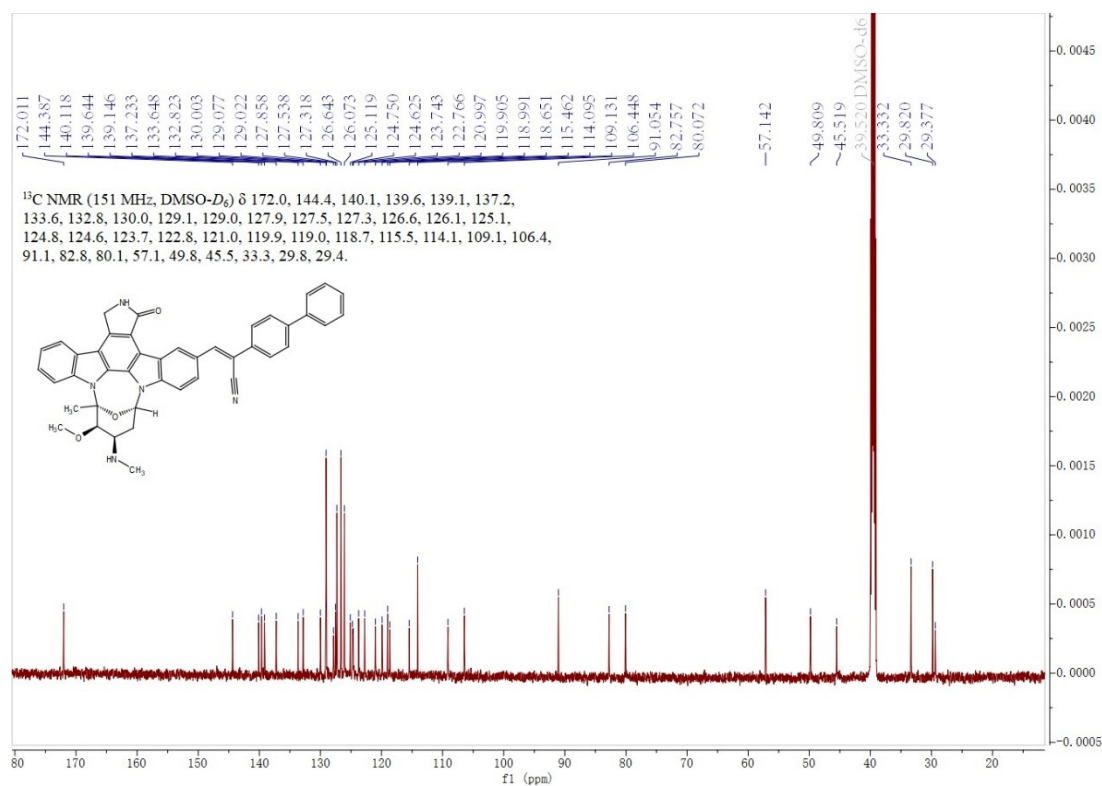

**Fig. 12** <sup>13</sup>C-NMR spectrum of **Y3** in DMSO-*d*<sub>6</sub>.

## The absorption of compounds in DMSO/H<sub>2</sub>O mixture

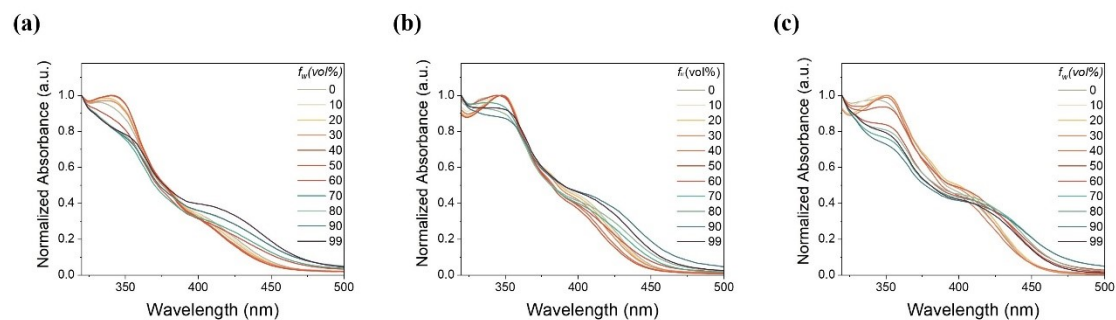

**Fig. S13** Absorption spectra of **Y1** (a), **Y2** (b) and **Y3** (c) in DMSO/H<sub>2</sub>O mixture with different  $f_w$  ( $1.0 \times 10^{-5}$  mol L<sup>-1</sup>).

## Fluorescence emission spectra of compounds in DMSO/glycerol mixture

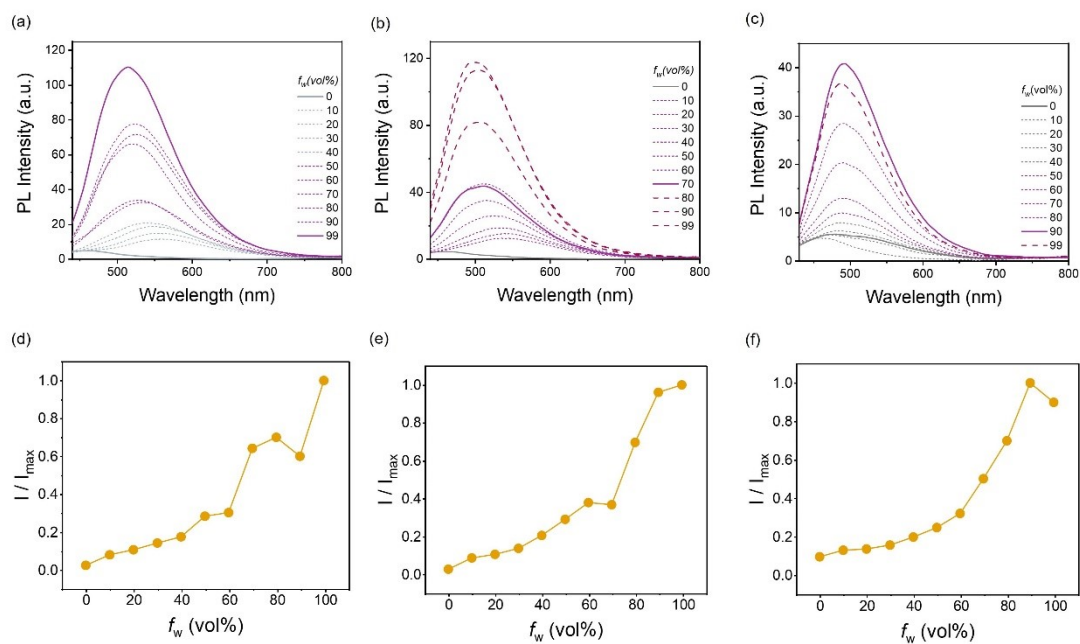

**Fig. S14** Fluorescence emission spectra of (a) **Y1**, (b) **Y2** and (c) **Y3** in pure DMSO with increasing glycerol fractions. Plots of FL emission intensity ( $I/I_{\max}$ ) versus the composition of the DMSO/glycerol mixture of (d) **Y1**, (e) **Y2** and (f) **Y3**.

### The absorption spectral and emission spectral of STQ in DMSO/H<sub>2</sub>O mixture

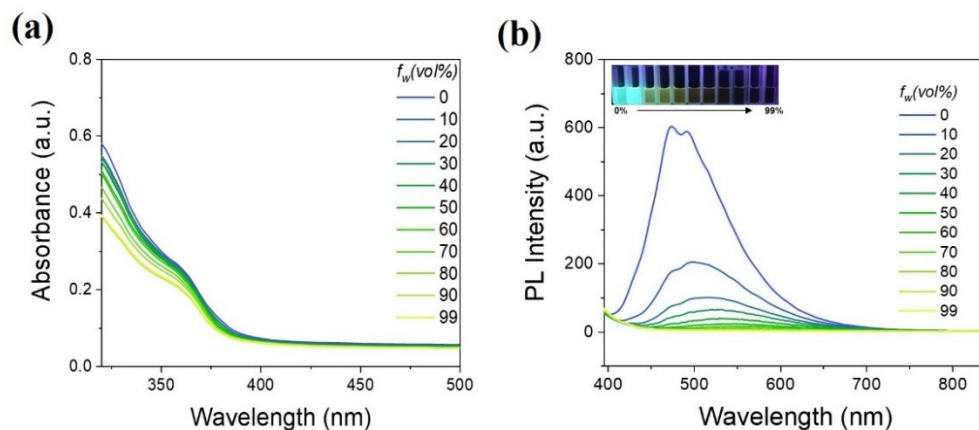

**Fig. S15** (a) Absorption spectra of **STQ** in DMSO/H<sub>2</sub>O mixture with different  $f_w$ . (b) The FL spectra of **STQ** in pure DMSO with increasing water fractions. (Inset: photographs of **STQ** in different DMSO/H<sub>2</sub>O mixtures under 365 nm hand-held UV lamp irradiation).

### Absorption spectral of Y1, Y2 and Y3 in various solvents

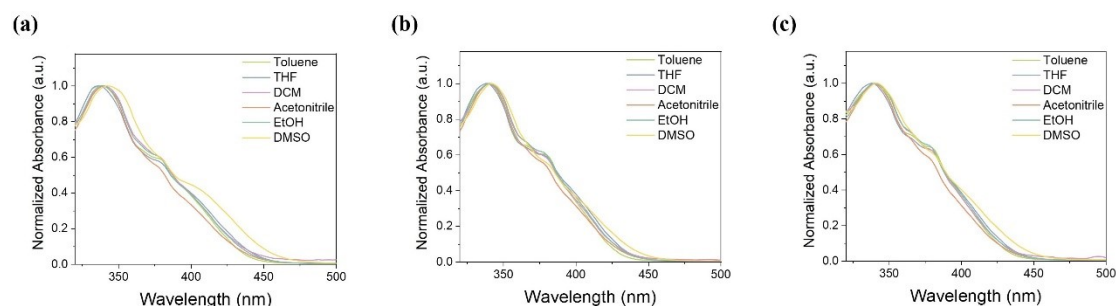

**Fig. S16** UV-vis absorption spectra of **Y1** (a), **Y2** (b) and **Y3** (c) ( $5 \times 10^{-5}$  mol/L) in different solvents.

### Lippert–Mataga plot for Y1, Y2 and Y3 in various solvents

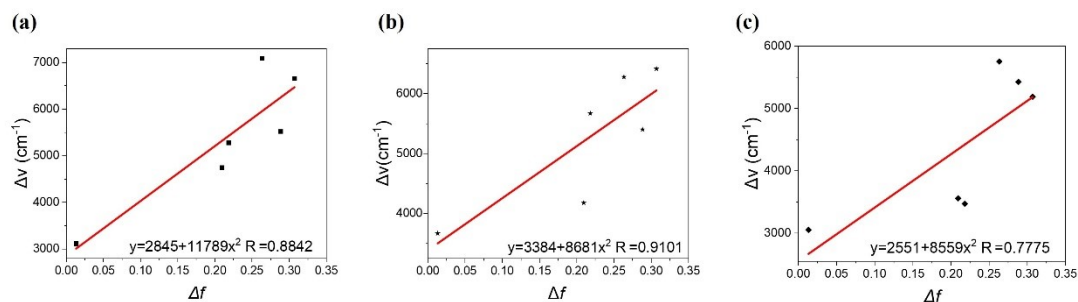

**Fig. S17** Lippert–Mataga plot for **Y1** (a), **Y2** (b) and **Y3** (c) in various solvents.

**Table S1. Photophysical Properties of Compounds in different solvents (50  $\mu$ M).**

| Compd. |                                              | Toluene | THF   | DCM   | ACN   | EtOH  | DMSO  |
|--------|----------------------------------------------|---------|-------|-------|-------|-------|-------|
| Y1     | $\lambda_{\text{abs}}(\text{nm})^{\text{a}}$ | 338     | 336   | 340   | 340   | 340   | 342   |
|        | $\lambda_{\text{em}}(\text{nm})^{\text{b}}$  | 472     | 508   | 522   | 560   | 532   | 586   |
|        | $\Delta\lambda(\text{nm})^{\text{c}}$        | 134     | 172   | 182   | 220   | 192   | 244   |
|        | $\Delta V(\text{cm}^{-1})^{\text{d}}$        | 8399    | 10077 | 10255 | 11555 | 10615 | 12175 |
| Y2     | $\lambda_{\text{abs}}(\text{nm})^{\text{a}}$ | 340     | 338   | 340   | 340   | 340   | 342   |
|        | $\lambda_{\text{em}}(\text{nm})^{\text{b}}$  | 522     | 518   | 520   | 540   | 518   | 552   |
|        | $\Delta\lambda(\text{nm})^{\text{c}}$        | 182     | 180   | 180   | 200   | 178   | 210   |
|        | $\Delta V(\text{cm}^{-1})^{\text{d}}$        | 10255   | 10281 | 10181 | 10893 | 10107 | 11124 |
| Y3     | $\lambda_{\text{abs}}(\text{nm})^{\text{a}}$ | 342     | 338   | 340   | 340   | 340   | 342   |
|        | $\lambda_{\text{em}}(\text{nm})^{\text{b}}$  | 462     | 480   | 476   | 530   | 522   | 536   |
|        | $\Delta\lambda(\text{nm})^{\text{c}}$        | 120     | 142   | 136   | 190   | 182   | 194   |
|        | $\Delta V(\text{cm}^{-1})^{\text{d}}$        | 7595    | 8752  | 8403  | 10544 | 10255 | 10583 |

<sup>a</sup> the maximum absorption wavelength; <sup>b</sup> the maximum emission wavelength; <sup>c</sup> the value of stokes shift; <sup>d</sup>  $\Delta V$  were calculated using the equation  $(1/\lambda_{\text{abs}} - 1/\lambda_{\text{em}}) \times 10^7$ .

### Density Functional Theory (DFT) Calculations

Density functional theory (DFT) calculations were performed using Gaussian 09 software at the B3LYP/6-311G level with the implicit solvent model (SMD, DMSO). The optimized geometries

and electronic structures of the compounds were first obtained at the B3LYP/6-31G level, incorporating D3 dispersion correction.

**Table S2. TD-DFT calculations using the SMD model to evaluate emission transitions of Y1 in toluene and DMSO**

| Solvents | Excited State         | $E_g$<br>(eV) <sup>a</sup> | $\lambda_{em}$ (nm) <sup>b</sup> | $f$<br>( oscillator<br>strengths ) |
|----------|-----------------------|----------------------------|----------------------------------|------------------------------------|
| Toluene  | $S_0 \rightarrow S_1$ | 2.80                       | 443                              | 0.70                               |
| DMSO     | $S_0 \rightarrow S_1$ | 2.70                       | 460                              | 0.92                               |

<sup>a</sup> Energy gap between  $S_0$  and  $S_1$ ; <sup>b</sup> the maximum emission wavelength
